# Supplementary material for: Weaving host matrices with intermolecular hydrogen bonds for high-efficiency white thermally activated delayed fluorescence
Source: Royal Society of Chemistry journal article supplement (doi:10.1039/d1sc04188f), 2021-01-01
Supplement: d1sc04188f1.pdf [file d1sc04188f1.pdf]

Supplementary Information

## **Weaving host matrixes with intermolecular hydrogen bonds for high-efficiency white thermally activated delayed fluorescence**

Yuee Tian<sup>‡</sup>, Huiqin Wang<sup>‡</sup>, Yi Man, Nan Zhang, Jing Zhang\*, Ying Li, Chunmiao Han and Hui Xu\*

Key Laboratory of Functional Inorganic Material Chemistry, Ministry of Education & School of Chemistry and Material Science, Heilongjiang University, 74 Xuefu Road, Harbin 150080, P. R. China.

E-mail: [zhangjing@hlju.edu.cn](mailto:zhangjing@hlju.edu.cn); [hxu@hlju.edu.cn](mailto:hxu@hlju.edu.cn)

### **Content**

|                                                                            |    |
|----------------------------------------------------------------------------|----|
| I. Experimental Section .....                                              | 2  |
| II. Single Crystal Structure .....                                         | 5  |
| III. Morphological Properties .....                                        | 7  |
| VI. EL Performance of DPXQPO-Based Blue and White TADF Diodes .....        | 9  |
| Table S1. EL performance of DPXQPO-hosted blue and white TADF devices..... | 13 |
| V. Gaussian Simulation Results .....                                       | 15 |
| VI. Electrical Properties .....                                            | 16 |
| VII. Photophysical Properties.....                                         | 18 |
| Table S2. Physical Properties of DPXQPO.....                               | 23 |
| VIII. References .....                                                     | 24 |

# I. Experimental Section

## Materials and Instruments

The reagents and solvents used for the synthesis were purchased from Aldrich and Alfa-Aesar companies and used without further purification. DMAC-DPS was purchased from p-OLED company and used directly. **DPEQPO** was prepared according to our previous report.<sup>[1]</sup> CCDC number of **DPEQPO** is CCDC 2100434.

<sup>1</sup>H NMR spectra were recorded using a Varian Mercury plus 400NB spectrometer relative to tetramethylsilane (TMS) as internal standard. Molecular masses were determined by a FINNIGAN LCQ Electro-Spraying Ionization-Mass Spectrometry (ESI-MS), or a MALDI-TOF-MS. Elemental analyses were performed on a Vario EL III elemental analyzer. The crystal suitable for single-crystal XRD analysis was obtained through slowly diffusing hexane into dichloromethane solution of **DPXQPO** at room temperature. All diffraction data were collected at 295 K on a Rigaku Xcalibur E diffractometer with graphite monochromatized Mo K $\alpha$  ( $\lambda = 0.71073 \text{ \AA}$ ) radiation in  $\omega$  scan mode. All structures were solved by direct method and difference Fourier syntheses. Non-hydrogen atoms were refined by full-matrix least-squares techniques on F2 with anisotropic thermal parameters. The hydrogen atoms attached to carbons were placed in calculated positions with C–H = 0.93  $\text{\AA}$  and U(H) = 1.2Ueq(C) in the riding model approximation. All calculations were carried out with the SHELXL97 program. Thermogravimetric analysis (TGA) and differential scanning calorimetry (DSC) were performed on Shimadzu DSC-60A and DTG-60A thermal analyzers under nitrogen atmosphere at a heating rate of 10  $^{\circ}\text{C min}^{-1}$ . Cyclic voltammetric (CV) studies were conducted using an Eco Chemie B. V. AUTOLAB potentiostat in a typical three-electrode cell with a platinum sheet working electrode, a platinum wire counter electrode and a silver/silver chloride (Ag/AgCl) reference electrode. Tetrabutylammonium hexafluorophosphate was used as electrolyte with a concentration of 0.1 mol L<sup>-1</sup>. All electrochemical experiments were carried out under a nitrogen atmosphere at room temperature in dichloromethane. Steady-state and time-resolved emission spectra were recorded with an Edinburgh FLS 1000 fluorescence spectrophotometer, based on time-correlated single photon counting (TCSPC) method with a nanosecond and a microsecond pulsed light sources. The film samples used for measurement were prepared

through *vacuum* evaporation.  $\eta_{\text{PL}}$  was evaluated with a labsphere 1-M-2 ( $\phi = 6''$ ) integrating sphere coated by Benflect with efficient light reflection in a wide range of 200-1600 nm. Ultraviolet Photoelectron Spectra (UPS) measurements were carried out with a Shimadzu/Kratos Axis Ultra DLD spectrometer, using the HeI radiation (21.21 eV) from a He discharge lamp. Peaks were recorded with constant pass energy of 5 eV and the step size of 0.05 eV. The pressure in the analysis chamber was around  $4.3 \times 10^{-9}$  torr. The instrument was operated in a mode that yielded a Fermi-level width of 0.4 eV for Ag metal and at a full width a half maximum of 0.54 eV for Ag 3d<sub>5/2</sub> core level peak. Energy scale was calibrated using the Fermi level of clean Ag.

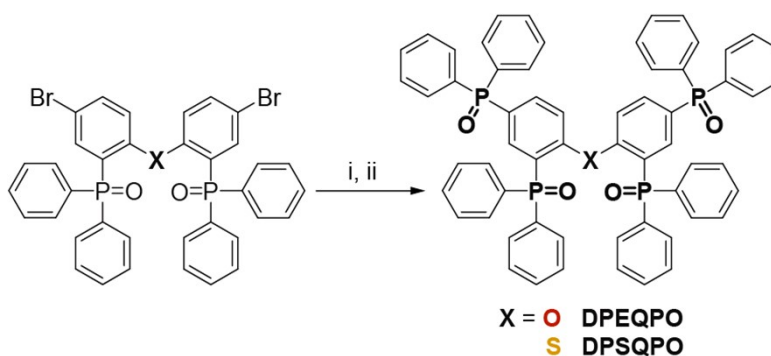

**Scheme S1.** Synthetic procedure of **DPXQPO**. i. DPSDPOBr<sub>2</sub>, NaOAc, Pd(OAc)<sub>2</sub>, PPh<sub>2</sub>, DMF, 130 °C, 24 h; ii. 30% H<sub>2</sub>O<sub>2</sub>, CH<sub>2</sub>Cl<sub>2</sub>, 0 °C, 4 h.

### Synthesis method

**(Thiobis(benzene-4,1,3-triyl))tetrakis(diphenylphosphine oxide) (DPSQPO):** In Ar, (thiobis(5-bromo-2,1-phenylene))bis(diphenylphosphine oxide) (DPSDPOBr<sub>2</sub>, 0.746 g, 1 mmol), diphenylphosphine (0.5 mL, 3 mmol), Pd(OAc)<sub>2</sub> (5 mg, 0.002 mmol) and NaOAc (0.246 g, 3 mmol) were added in N,N'-dimethyl formamide (DMF, 5 ml), and heated to 130 °C. The mixture was stirred for 24 h. The system was then cooled to room temperature and poured into water. The mixture was extracted with dichloromethane (3 × 10 ml). The combined oil phase was concentrated to 10 mL, and then cooled to 0 °C. The mixture was added with 30% hydrogen peroxide (0.7 ml, 5 mmol) in dropwise. After reacting for 4 h, the system was extracted with water and dichloromethane (3 × 10 ml). The organic layer was combined and dried with anhydrous Na<sub>2</sub>SO<sub>4</sub>. The solvent was removed in *vacuo*, and the residue was purified by flash column chromatography to give

the white powder of 0.730 g with a yield of 74%.

$^1\text{H}$  NMR (TMS,  $\text{CDCl}_3$ , 400 MHz):  $\delta$  = 7.698-7.650 (m, 2H), 7.526-7.468 (m, 20H), 7.431-7.347 (m, 14H), 7.343-7.272 (m, 9H), 7.085-7.052 ppm (m, 2H); LDI-MS:  $m/z$  (%): 986 (100) [ $\text{M}^+$ ]; elemental analysis (%) for  $\text{C}_{60}\text{H}_{46}\text{O}_4\text{P}_4\text{S}$ : C 73.02, H 4.70; found: C 73.04, H 4.72. CCDC Number: CCDC2100433.

### **Theoretical calculation**

The ground state and singlet and triplet excited states in vacuum were simulated on the basis of single crystal data by the restricted and unrestricted formalism of Beck's three-parameter hybrid exchange functional<sup>[2]</sup> and Lee, and Yang and Parr correlation functional<sup>[3]</sup> B3LYP/6-31G(d,p), respectively. The total energies were also corrected by zero-point energy. TDDFT simulation for natural transition orbital (NTO) analysis was performed on the basis of optimized ground-state geometries at the level of  $\omega\text{B97XD}/6-31\text{G}(\text{d},\text{p})$ .<sup>[4]</sup> The contours were visualized with Gaussview 5.0. All computations were performed using the Gaussian 09 package.

### **Fabrication and characterization of OLEDs**

ITO substrate was cleaned with detergents and deionized water, dried in an oven at 120 °C for 4 h, treated with oxygen plasma for 3 min, and then transferred to a deposition chamber. Devices were fabricated by evaporating each layer onto ITO substrate sequentially at a pressure below  $1 \times 10^{-6}$  Tor. A  $\text{MoO}_3$  layer was first deposited on ITO substrate at  $0.1 \text{ nm s}^{-1}$ . The deposition rates of organic layers were  $0.1\text{-}0.3 \text{ nm s}^{-1}$ . Then, a 1nm layer of LiF was deposited at  $0.1 \text{ nm s}^{-1}$ . Finally, a 100-nm-thick layer of Al was deposited at  $0.6 \text{ nm s}^{-1}$  as the cathode. The devices were then transferred to glovebox and encapsulated with hot melt glue. The emission areas of the devices were  $0.09 \text{ cm}^2$ . The EL spectra were measured with a PR655 spectra colorimeter. The current-density-voltage and brightness-voltage curves of the devices were measured using a Keithley 4200 source meter and a calibrated silicon photodiode. All the measurements were carried out in atmosphere.

## II. Single Crystal Structure

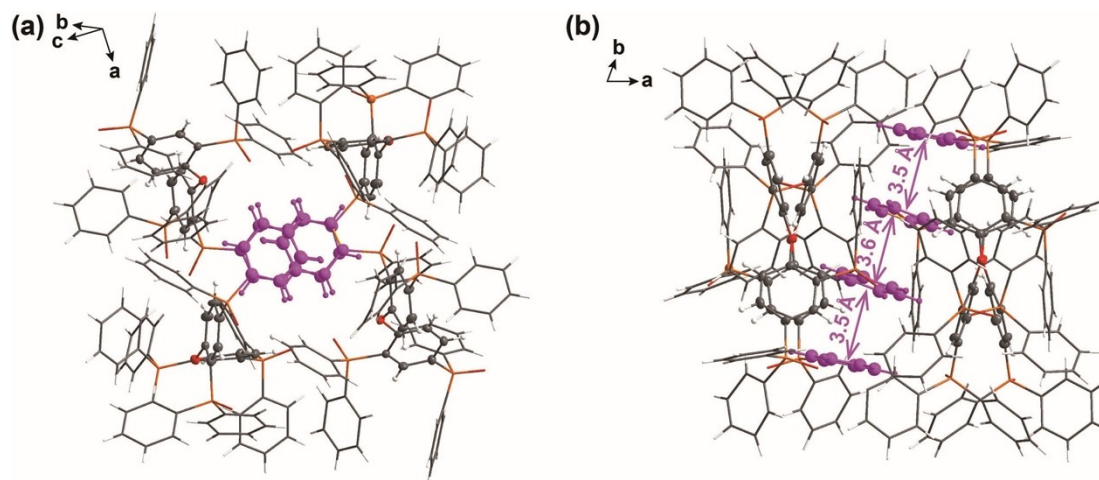

**Figure S1.** Single crystal packing diagram of **DPEQPO**. The intramolecular  $\pi$ - $\pi$  interaction and hydrogen bonds are highlighted with blue and purple dash lines.

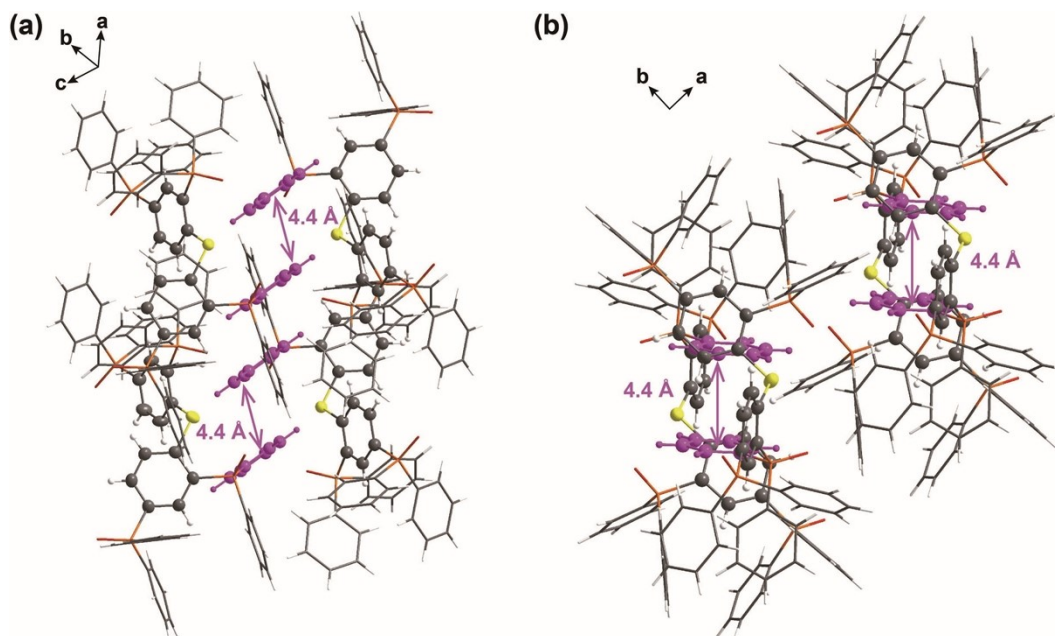

**Figure S2.** Single crystal packing diagram of **DPSQPO**. The intramolecular  $\pi$ - $\pi$  interaction and hydrogen bonds are highlighted with blue and purple dash lines.

### III. Morphological Properties

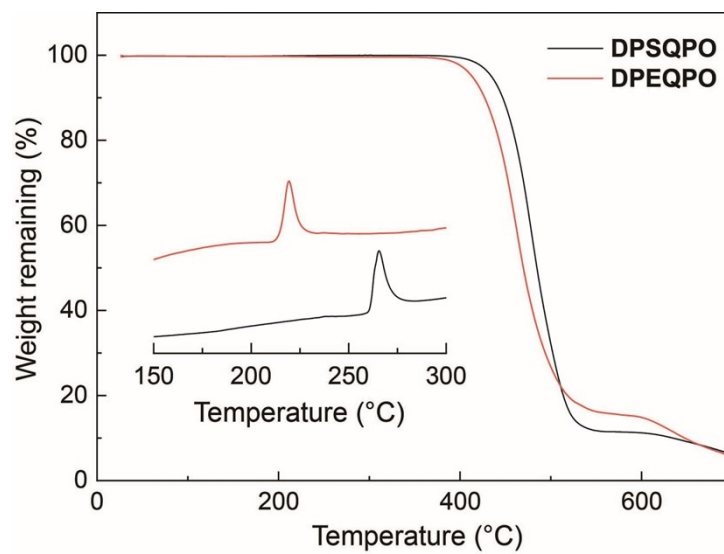

**Figure S3.** DSC and TGA curves of **DPSQPO** and **DPEQPO**.

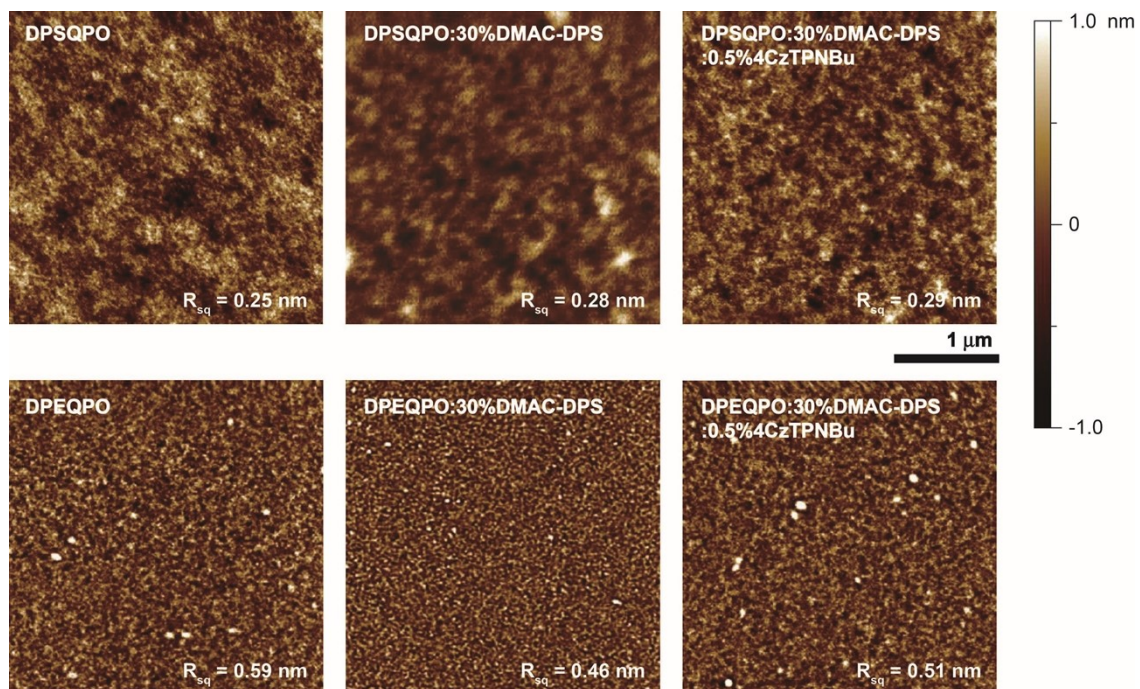

**Figure S4.** AFM images of *vacuum*-evaporated **DPSQPO** and **DPEQPO** based films (100 nm).



## VI. EL Performance of DPXQPO-Based Blue and White TADF Diodes

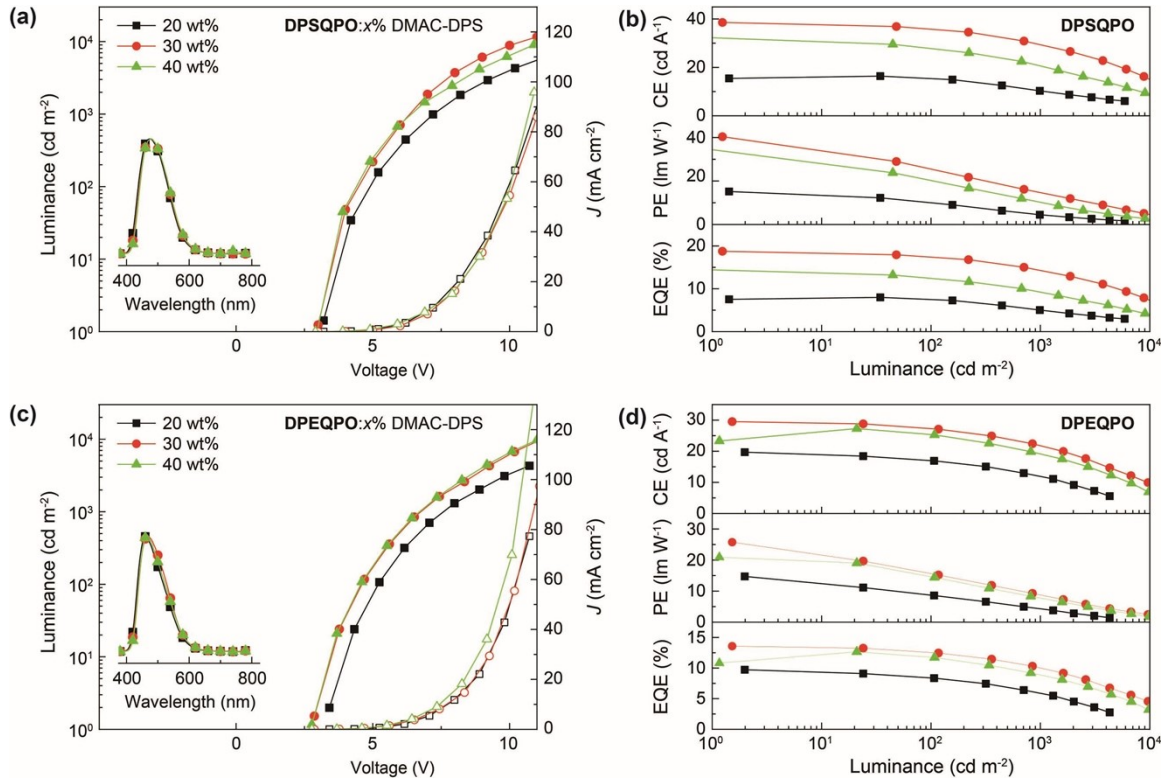

**Figure S5.** Current density ( $J$ )-voltage-luminance characteristics and EL spectra (inset) of DPSQPO (a) and DPEQPO (c) based blue-emitting devices; Current efficiency (CE), power efficiency (PE) and external quantum efficiency (EQE)-Luminance curves of the devices based on DPSQPO (b) and DPEQPO (d).

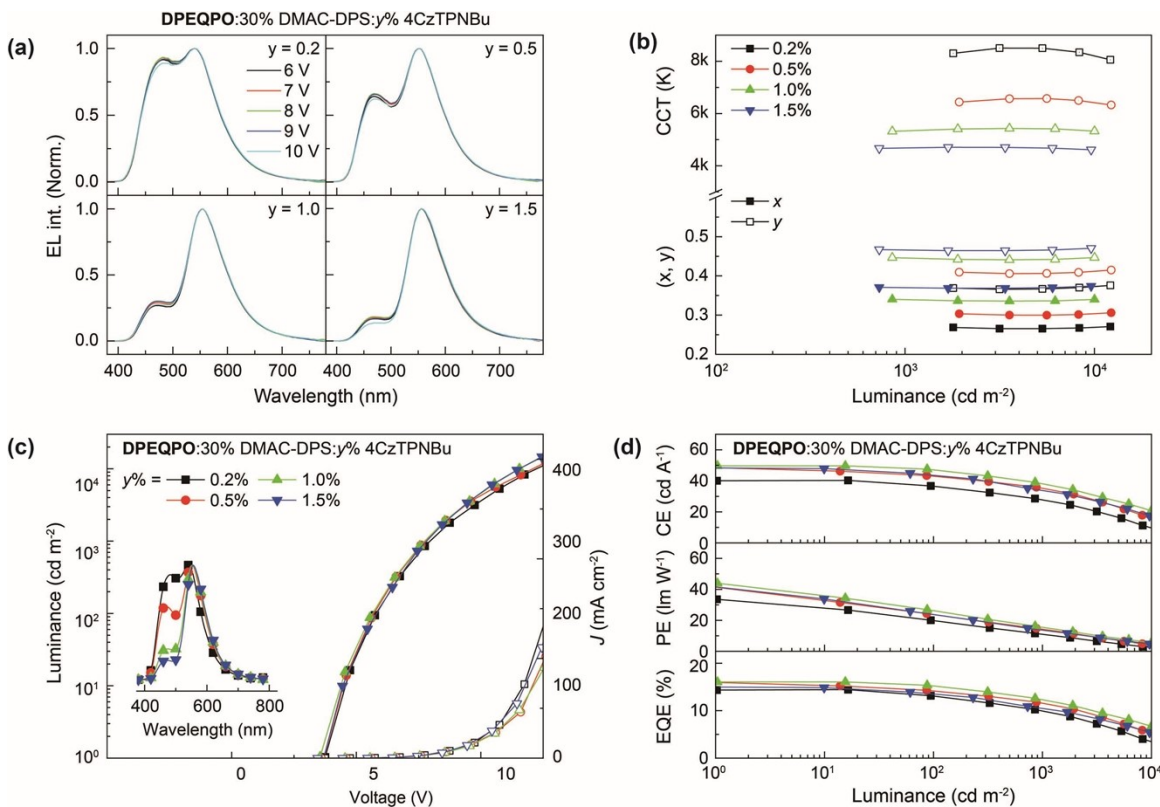

**Figure S6.** Dependence of current density ( $J$ )-voltage-luminance characteristics and EL spectra (inset) of **DPSQPO** (a) and **DPEQPO** (c) based WOLEDs on the doping concentration of 4CzTPNBu; influence of 4CzTPNBu concentrations on current efficiency (CE), power efficiency (PE) and external quantum efficiency (EQE)-Luminance curves of **DPSQPO** (b) and **DPEQPO** (d) based WOLEDs.

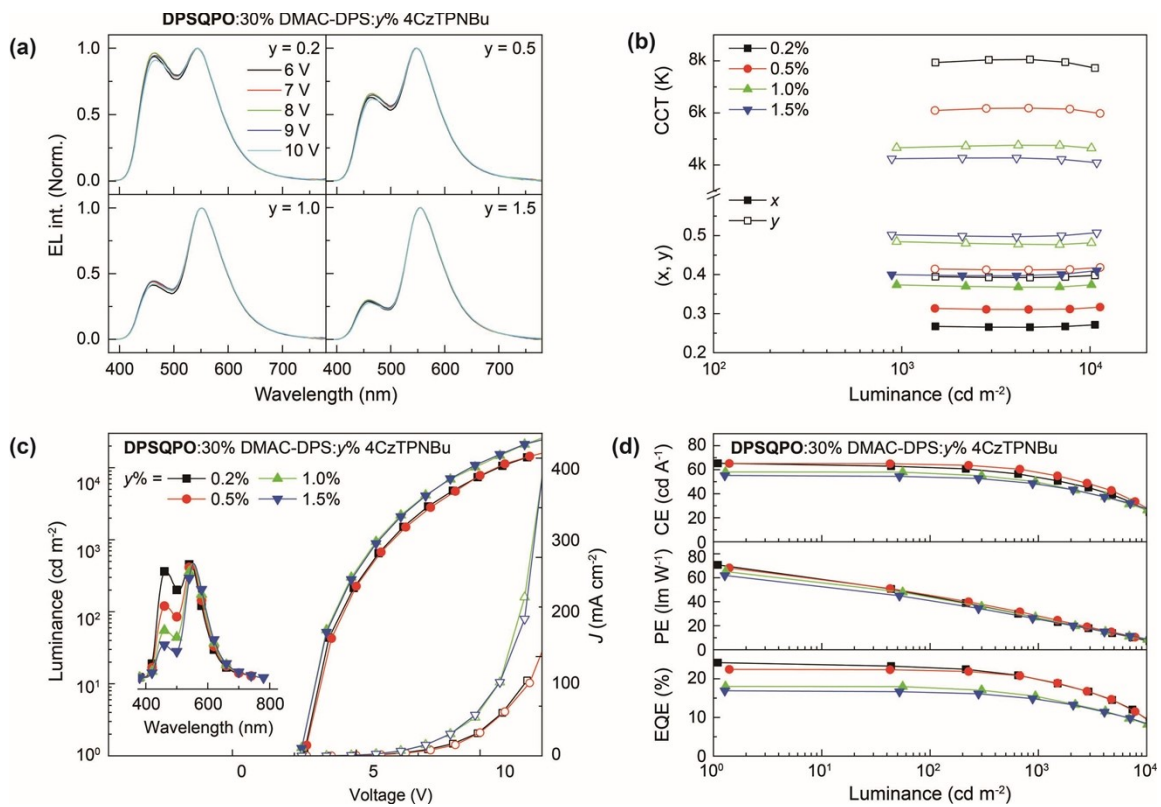

**Figure S7.** Dependence of current density ( $J$ )-voltage-luminance characteristics and EL spectra (inset) of **DPSQPO** (a) and **DPEQPO** (c) based WOLEDs on the doping concentration of 4CzTPNBu; influence of 4CzTPNBu concentrations on current efficiency (CE), power efficiency (PE) and external quantum efficiency (EQE)-Luminance curves of **DPSQPO** (b) and **DPEQPO** (d) based WOLEDs.

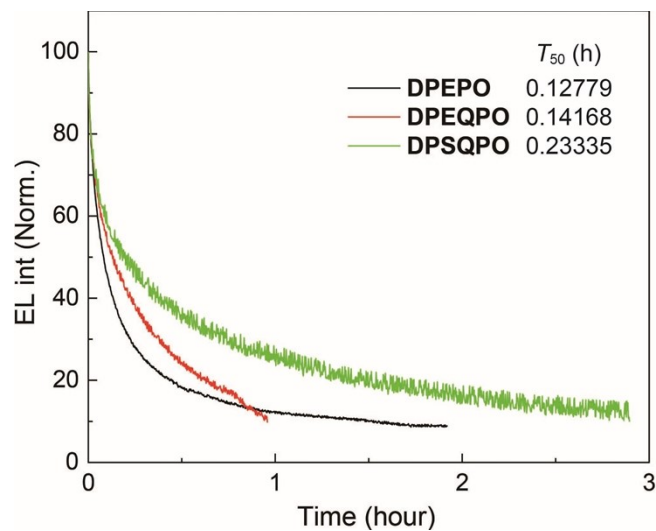

**Figure S8.** Comparison on device duration of **DPEPO**, **DPEQPO** and **DPSQPO**-based WOLEDs.  $T_{50}$  refers to time used at 50% luminance reduction, which were evaluated by a direct method. The devices for measurement were simply encapsulated with heat glue, and directly measured in ambient condition.

**Table S1.** EL performance of **DPXQPO**-hosted blue and white TADF devices.

| Emissive layer                                             | $x/y$<br>(%) | $V^{[a]}$<br>(V) | $L_{\max}^{[b]}$<br>( $\text{cd m}^{-2}$ ) | $\eta^{[c]}$                              |                                           |                         | $\lambda_{\text{EL}}$ (nm) /<br>CIE (x, y) <sup>[d]</sup> |
|------------------------------------------------------------|--------------|------------------|--------------------------------------------|-------------------------------------------|-------------------------------------------|-------------------------|-----------------------------------------------------------|
|                                                            |              |                  |                                            | $\eta_{\text{CE}}$ ( $\text{cd A}^{-1}$ ) | $\eta_{\text{PE}}$ ( $\text{lm W}^{-1}$ ) | $\eta_{\text{EQE}}$ (%) |                                                           |
| <b>DPSQPO:x%</b><br><b>DMAC-DPS</b>                        | 20           | 3.2, 5.2, 7.2    | 5907                                       | 16.4, 14.9, 10.3                          | 15.2, 9.0, 4.5                            | 8.0, 7.3, 5.0           | 478 / (0.17, 0.27)                                        |
|                                                            | 30           | 3.0, 4.5, 6.5    | 12250                                      | 38.6, 36.9, 30.9                          | 40.4, 28.9, 16.2                          | 18.8, 17.9, 15.0        | 480 (0.18, 0.29)                                          |
|                                                            | 40           | 2.9, 4.4, 6.3    | 9065                                       | 32.4, 27.5, 22.4                          | 35.1, 20.3, 11.9                          | 14.5, 12.4, 10.0        | 480 (0.19, 0.30)                                          |
| <b>DPEQPO:x%</b><br><b>DMAC-DPS</b>                        | 20           | 4.2, 6.2, 9.2    | 4305                                       | 19.7, 16.9, 11.1                          | 14.7, 8.6, 3.8                            | 9.7, 8.4, 5.5           | 460 / (0.17, 0.24)                                        |
|                                                            | 30           | 3.6, 5.6, 8.0    | 9656                                       | 29.5, 27.1, 22.4                          | 25.7, 15.2, 9.3                           | 13.6, 12.5, 10.3        | 464 / (0.18, 0.26)                                        |
|                                                            | 40           | 3.5, 5.5, 8.0    | 9767                                       | 27.3, 25.3, 19.9                          | 20.9, 14.4, 8.3                           | 12.7, 11.7, 9.2         | 468 / (0.17, 0.27)                                        |
| <b>DPSQPO:30%</b><br><b>DMAC-DPS:y%</b><br><b>4CzTPNBu</b> | 0.2          | 2.9, 4.2, 6.2    | 13940                                      | 65.3, 61.7, 56.4                          | 70.8, 48.6, 30.0                          | 24.2, 22.7, 20.9        | 476, 540 / (0.28, 0.39)                                   |
|                                                            | 0.5          | 3.0, 4.5, 6.5    | 17533                                      | 65.2, 64.4, 60.4                          | 68.2, 45.5, 31.6                          | 22.4, 22.1, 20.7        | 468, 552 / (0.31, 0.41)                                   |
|                                                            | 1.0          | 2.8, 4.2, 5.8    | 28240                                      | 58.1, 55.9, 50.0                          | 65.2, 42.9, 27.1                          | 18.0, 17.5, 15.5        | 468, 552 / (0.37, 0.48)                                   |
|                                                            | 1.5          | 2.8, 4.2, 5.8    | 25843                                      | 55.2, 53.5, 48.6                          | 61.9, 40.0, 26.3                          | 16.9, 16.3, 14.9        | 468, 556 / (0.40, 0.50)                                   |
| <b>DPEQPO:30%</b><br><b>DMAC-DPS:y%</b><br><b>4CzTPNBu</b> | 0.2          | 3.7, 5.8, 7.8    | 12140                                      | 40.3, 36.8, 28.5                          | 33.6, 20.1, 11.5                          | 14.4, 13.2, 10.2        | 464, 544 / (0.27, 0.37)                                   |
|                                                            | 0.5          | 3.6, 5.6, 7.6    | 16890                                      | 48.7, 43.4, 35.8                          | 42.5, 24.3, 14.8                          | 16.0, 14.2, 11.8        | 464, 548 / (0.30, 0.41)                                   |
|                                                            | 1.0          | 3.6, 5.6, 7.6    | 20710                                      | 49.7, 47.5, 39.0                          | 44.0, 26.8, 16.2                          | 16.1, 15.3, 12.5        | 464, 552 / (0.34, 0.44)                                   |
|                                                            | 1.5          | 3.5, 5.5, 7.5    | 20700                                      | 48.4, 42.7, 33.2                          | 44.1, 23.0, 14.4                          | 15.0, 13.4, 10.5        | 464, 556 / (0.37, 0.47)                                   |

[a] At 1, 100 and 1000  $\text{cd m}^{-2}$ ; [b] the maximum luminance; [c] EL efficiencies at the maximum and 100 and 1000  $\text{cd m}^{-2}$ ; [d] peak wavelengths and CIE coordinates of EL emissions at 1000  $\text{cd m}^{-2}$ .

**Table S2.** EL performance of representative TADF white OLEDs.

| Emissive layer                                                          | $V^{[a]}$<br>(V) | $L_{\max}^{[b]}$<br>(cd m <sup>-2</sup> ) | $\eta^{[c]}$                             |                                          |                         | $\lambda_{\text{EL}}$ (nm) /<br>CIE (x, y) <sup>[d]</sup> | Ref.                                                   |
|-------------------------------------------------------------------------|------------------|-------------------------------------------|------------------------------------------|------------------------------------------|-------------------------|-----------------------------------------------------------|--------------------------------------------------------|
|                                                                         |                  |                                           | $\eta_{\text{CE}}$ (cd A <sup>-1</sup> ) | $\eta_{\text{PE}}$ (lm W <sup>-1</sup> ) | $\eta_{\text{EQE}}$ (%) |                                                           |                                                        |
| TrisPCz mCBP:4CzPN mCBP:4CzPN<br>:4CzTPN-Ph PPT:3CzTRZ                  | 3.6, 5.4, 7.8    | ~4000                                     | 45.6, 32.4, 20.6                         | 34.1, 18.8, 8.3                          | 17.0, 13.3, 8.5         | 480, 580<br>(0.33, 0.41)                                  | <i>Appl. Phys. Lett.</i><br><b>2014</b> , 104, 233304  |
| CBP:3,6-2TPA-TXO CBP CBP:3,6-<br>2TPA-TX                                | 3.4, 6.7, 9.1    | -                                         | 49.5, 14.9, 8.5                          | 48.6, 6.9, 2.9                           | 20.4, 6.9, 1.3          | 470, 580<br>(0.32, 0.40)                                  | <i>Adv. Funct. Mater.</i><br><b>2016</b> , 26, 6904    |
| HATCN TAPC CBP:NI-1-<br>PhTPA CBP:PXZDSO2 CBP:NI-1-<br>PhTPA TmPyPB LiF | 3.6, -, -        | >10000                                    | 43.3, -, 36.1                            | 33.6, -, 17.7                            | 15.8, -, 13.3           | 440, 560<br>(0.40, 0.48)                                  | <i>Adv. Mater.</i> <b>2016</b> , 28,<br>4614           |
| SFXSPO:DMAC-DPS:4CzPNPh                                                 | 3.9, <5.5, <7.3  | ~15000                                    | 50.5, 48.5, 41.4                         | 40.6, 27.6, 17.9                         | 19.1, 18.3, 15.7        | 480, 560<br>(0.32, 0.43)                                  | <i>Adv. Mater.</i> <b>2016</b> , 28,<br>3122           |
| SXSPO:DMAC-DPS:4CzTPNBu                                                 | 3.1, 4.8, 6.9    | 22430                                     | 56.7, 51.0, 43.5                         | 57.5, 34.0, 20.1                         | 22.1, 20.0, 17.0        | 468, 548<br>0.31, 0.39                                    | <i>Chem. Eng. J.</i> <b>2019</b> ,<br>374, 471-478     |
| CBP:FDQPXZ DPEPO:DMAC-DPS                                               | 2.6, 2.8, 3.2    | < 30000                                   | 51.3, 46.5, 31.9                         | 59.6, 52.4, 31.7                         | 20.5, 18.8, 13.0        | 480, 560<br>(0.33, 0.41)                                  | <i>Nat Commun</i> <b>2019</b> ,<br>10, 2380.           |
| DBFDPO:TtBCzDFTTPO:4CzTPNB<br>u                                         | 3.1, 3.8, 5.1    | 20125                                     | 60.6, 55.6, 49.1                         | 61.4, 42.5, 30.3                         | 22.3, 20.4, 18.0        | 480, 544 (0.28,<br>0.40)                                  | <i>Adv. Funct. Mater.</i><br><b>2020</b> , 30, 1908568 |
| <i>pt</i> BCzPO2TPTZ:4CzTPNBu                                           | 3.1, 5.5, 7.9    | 37160                                     | 52.7, 51.7, 46.2                         | 55.1, 32.4, 18.1                         | 23.6, 23.0, 20.7        | 480, 560<br>(0.34, 0.36)                                  | <i>Adv. Mater.</i> <b>2020</b> , 32,<br>1906950        |
| <i>m</i> CP: <i>p</i> DPBITPO:35% DMAC-<br>DPS:0.5% 4CzTPNBu            | 2.9, 4.9, 7.1    | 36760                                     | 90.9, 84.3, 75.6                         | 98.4, 54.0, 34.4                         | 30.6, 28.4, 25.4        | 476, 564<br>(0.43, 0.48)                                  | <i>Nat Commun</i> <b>2021</b> ,<br>12, 3640            |

[a] At 1, 100 and 1000 cd m<sup>-2</sup>; [b] the maximum luminance; [c] EL efficiencies at the maximum and 100 and 1000 cd m<sup>-2</sup>; [d] peak wavelengths and CIE coordinates of EL emissions at 1000 cd m<sup>-2</sup>.

## V. Gaussian Simulation Results

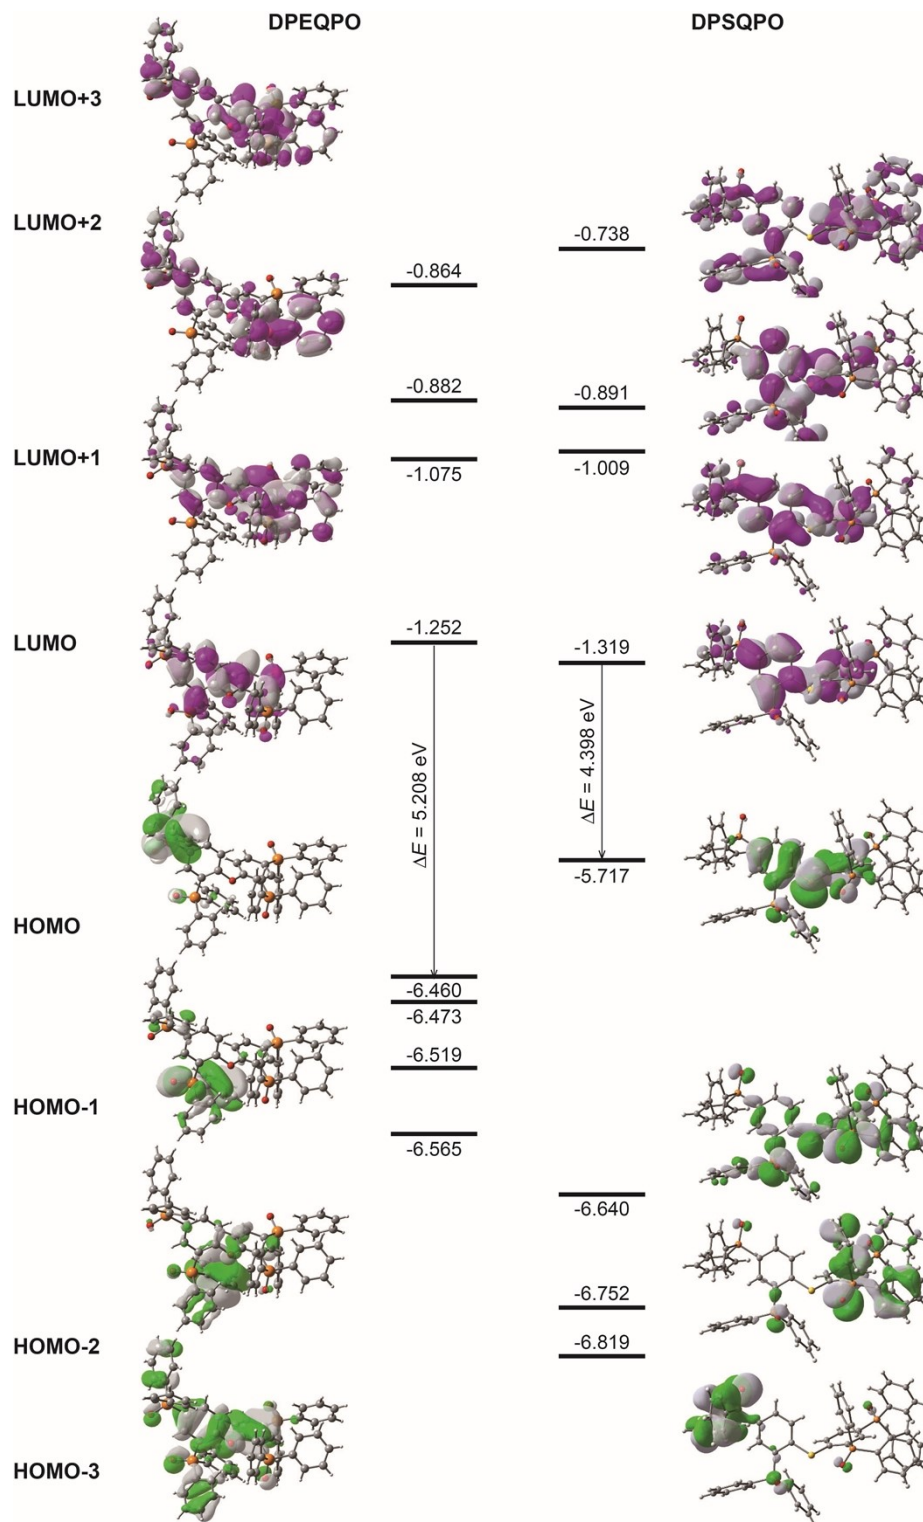

Figure S9. Frontier molecular orbital (FMO) energy levels and contours of DPXQPO.

## VI. Electrical Properties

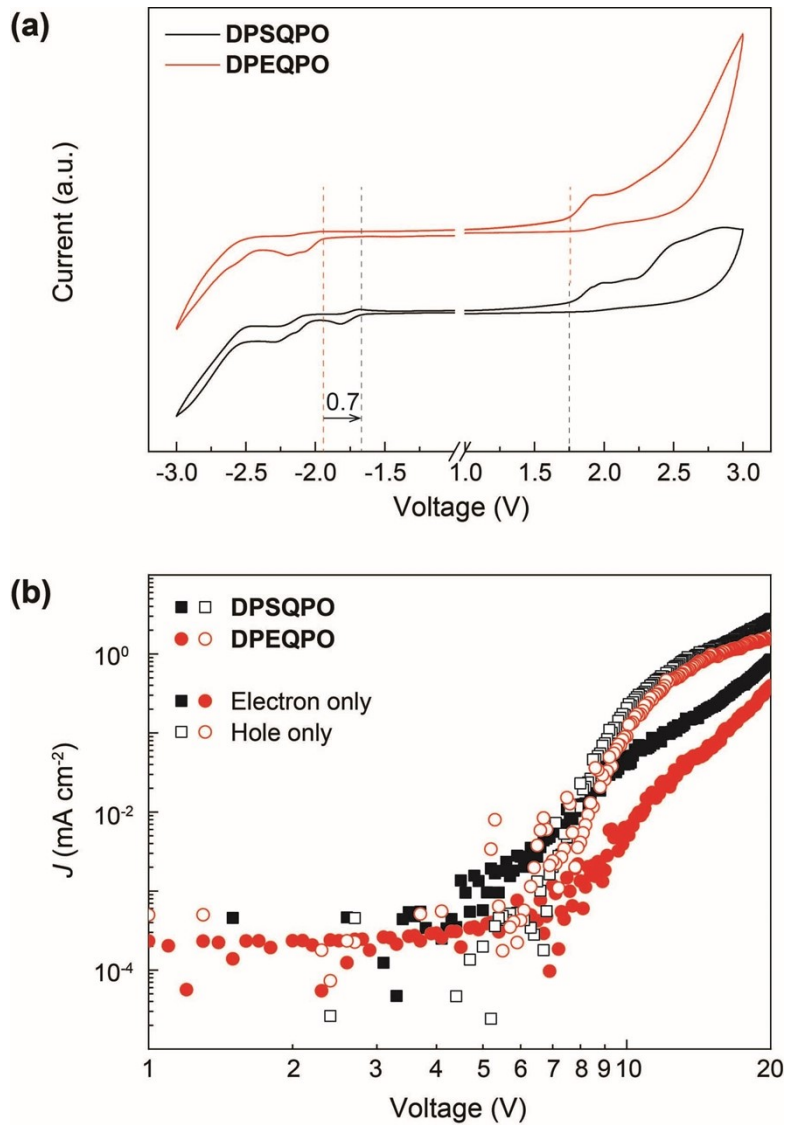

**Figure S10.** (a) Cyclic voltammograms of DPXQPO measured at room temperature with the scanning rate of 100 mV s<sup>-1</sup>; (b) Voltage-current characteristics of single-carrier transporting devices based on DPXQPO with the structures of ITO|MoO<sub>3</sub> (6 nm)|DPXQPO (100 nm)|MoO<sub>3</sub> (6 nm)|Al (100 nm) for hole-only and ITO|LiF (1 nm)|DPXQPO (100 nm)|LiF (1 nm)|Al (100 nm) for hole-only, respectively.



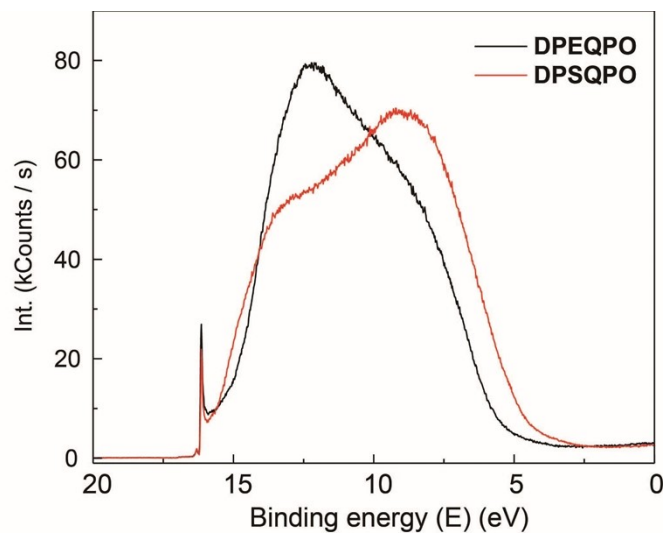

**Figure S11.** UPS spectra of **DPXQPO** films (100 nm).

## VII. Photophysical Properties

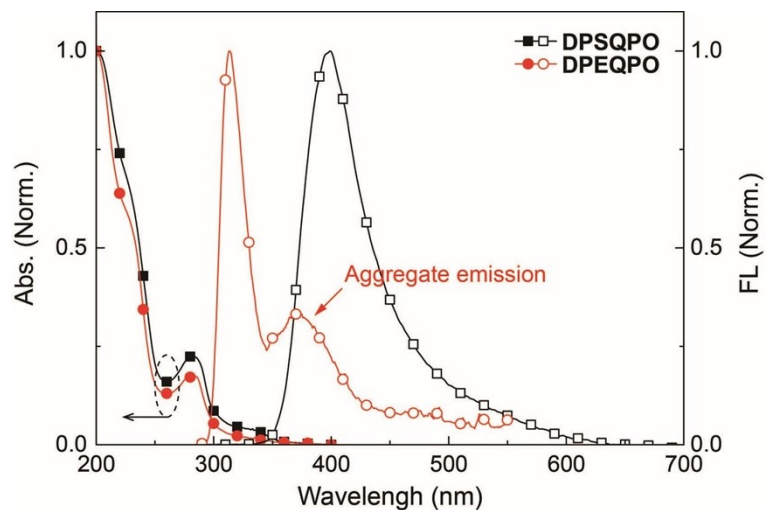

**Figure S12.** UV-vis absorption and FL spectra of *vacuum*-evaporated neat films for **DPXQPO** (100 nm).

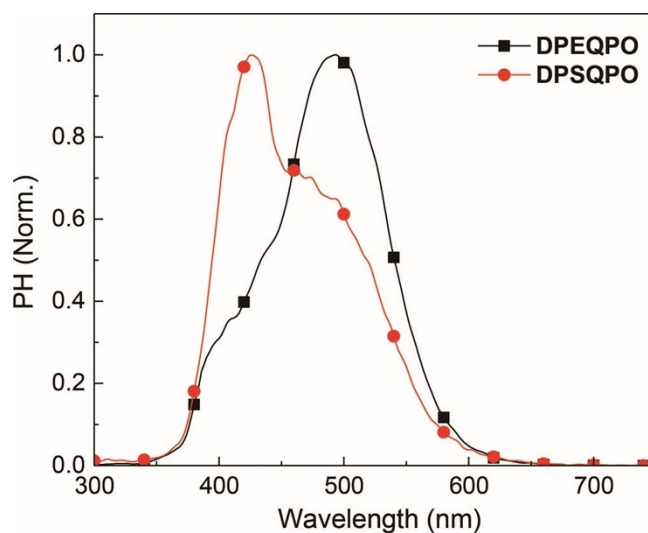

**Figure S13.** PH spectra of *vacuum*-evaporated neat films for **DPXQPO** (100 nm) measured with time-resolved technology after a delay of 1 ms.

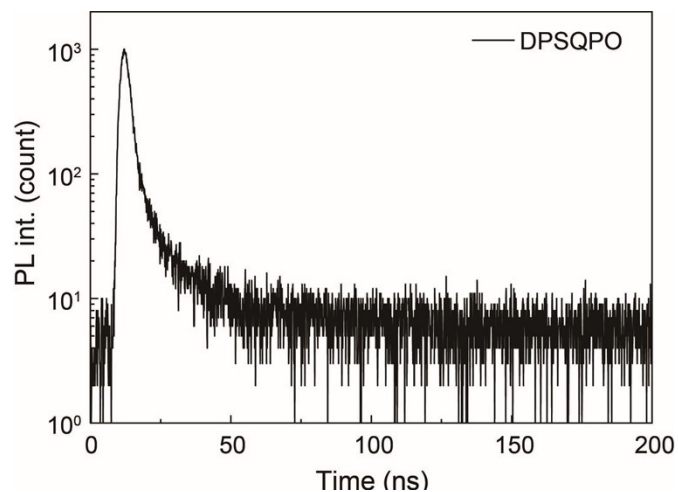

**Figure S14.** Emission time decay of neat **DPSQPO** films (100 nm).

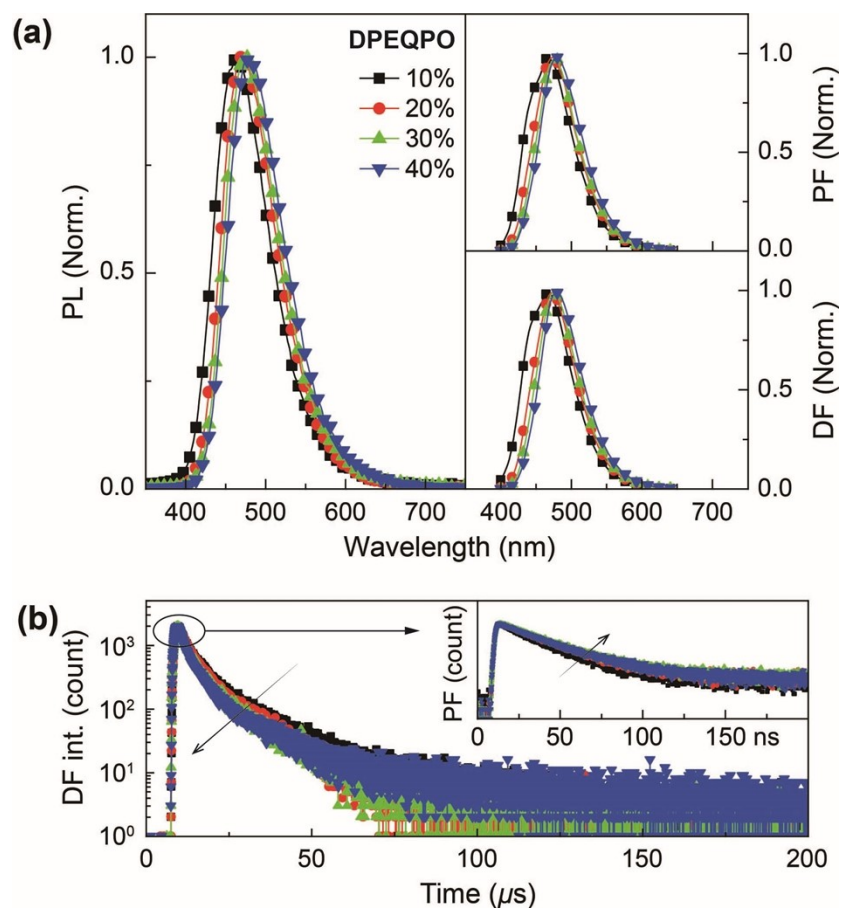

**Figure S15.** Dependence of (a) steady-state PL (left), PF and DF spectra and (b) PF and DF time decays on doping concentration of **DPEQPO**:*x*% DMAC-DPS films (100 nm).

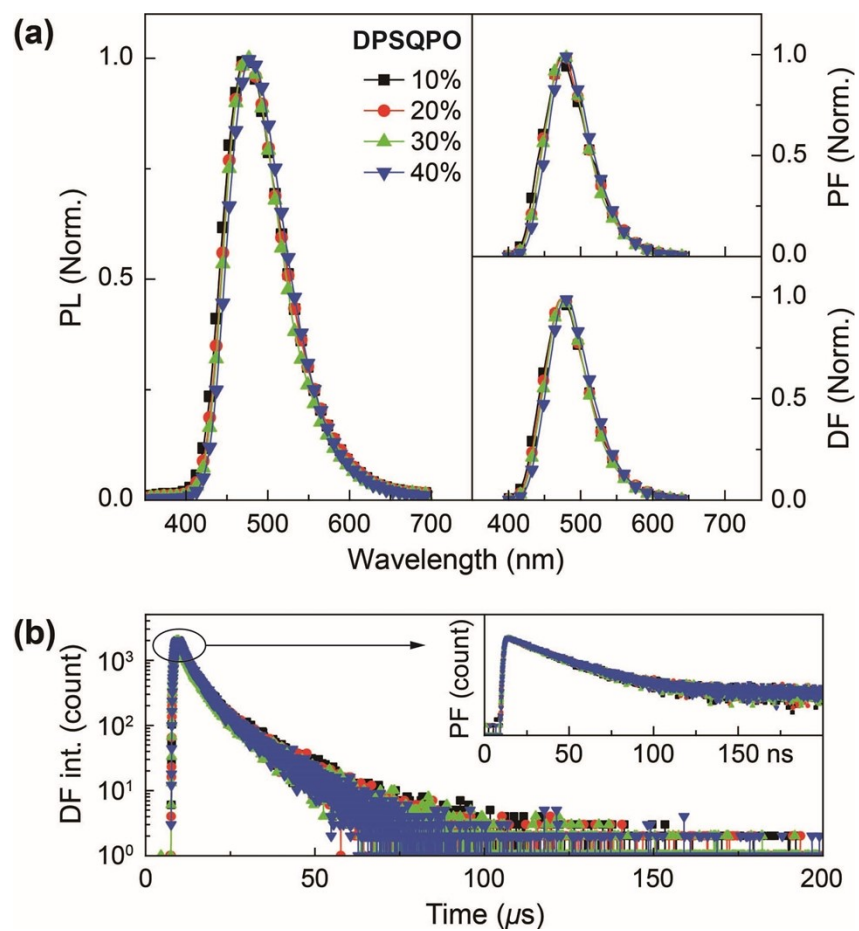

**Figure S16.** Dependence of (a) steady-state PL (left), PF and DF spectra and (b) PF and DF time decays on doping concentration of **DPSQPO**:*x*% DMAC-DPS films (100 nm).

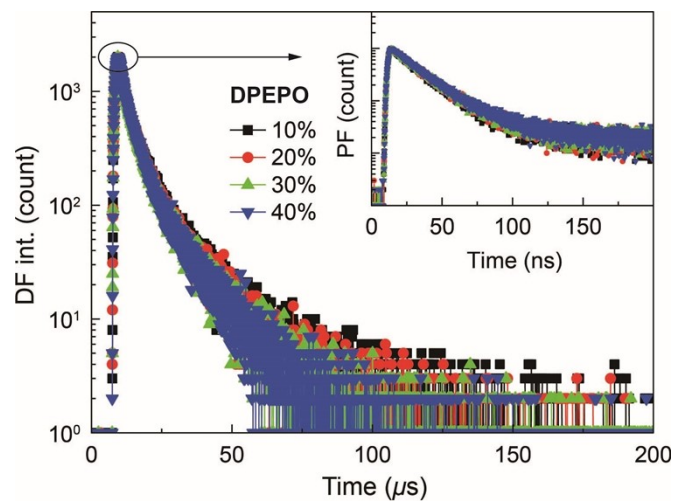

**Figure S17.** Dependence of PF and DF time decays on doping concentration of **DPEPO:***x*% DMAC-DPS films (100 nm).

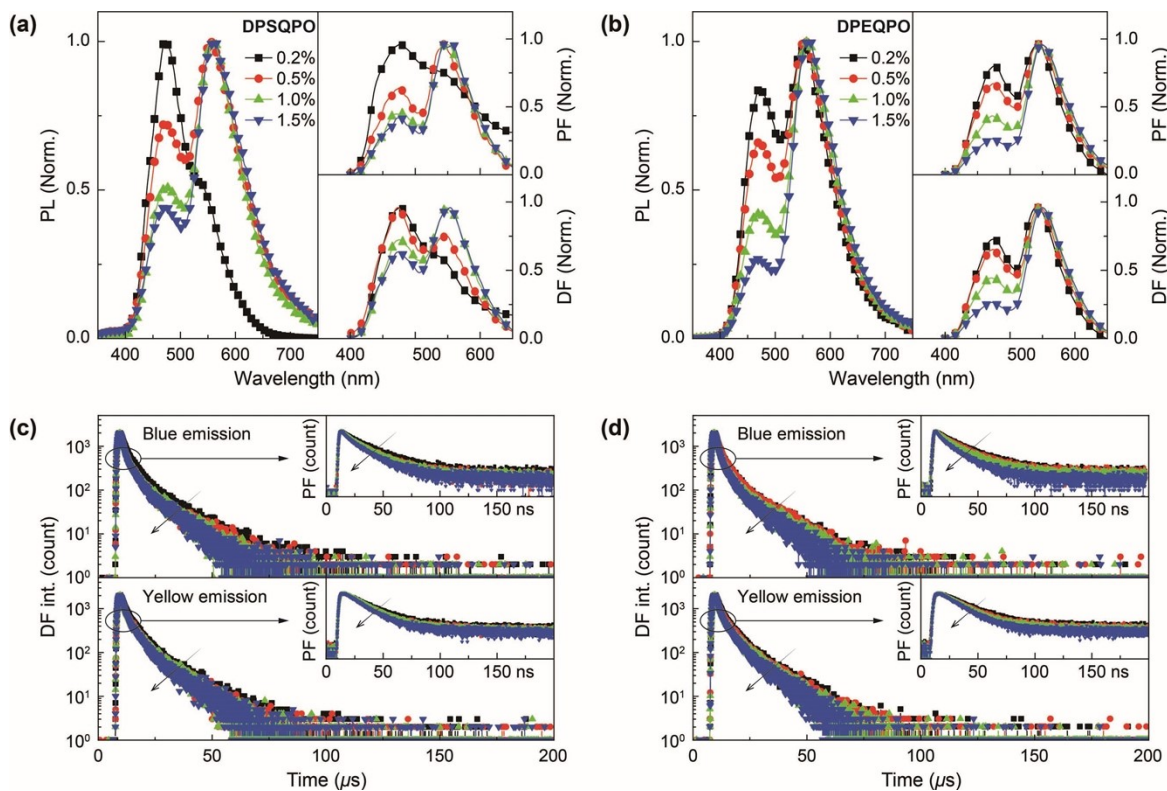

**Figure S18.** Dependence of (ab) steady-state PL (left), PF and DF spectra and (cd) PF and DF time decays of blue and yellow components on doping concentration of **DPSQPO:30% DMAC-DPS:y% 4CzTPNBu** (ac) and **DPEQPO:30% DMAC-DPS:y% 4CzTPNBu** (bd) films (100 nm).

**Table S3.** Physical Properties of **DPXQPO**.

| TADF dye      | $\lambda_{\text{Abs}}$<br>(nm) | $\lambda_{\text{PL}}$<br>(nm) | $S_1$<br>(eV)       | $T_1$<br>(eV)                              | $\Delta E_{\text{ST}}^{[\text{d}]}$<br>(eV) | $f_s$               | $T_m/T_d$<br>(°C)      | HOMO<br>(eV)                                | LUMO<br>(eV)                                | $\mu_G^{[\text{c}]}$<br>(Debye) |
|---------------|--------------------------------|-------------------------------|---------------------|--------------------------------------------|---------------------------------------------|---------------------|------------------------|---------------------------------------------|---------------------------------------------|---------------------------------|
| <b>DPSQPO</b> | 228, 262, 326 <sup>[a]</sup>   | 365 <sup>[a]</sup>            | 3.02 <sup>[a]</sup> | 2.91 <sup>[a]</sup>                        | 0.11 <sup>[a]</sup>                         | 0.45 <sup>[c]</sup> | 265/427 <sup>[e]</sup> | -5.72 <sup>[c]</sup>                        | -1.32 <sup>[c]</sup>                        | 3.17 <sup>[c]</sup>             |
|               | 228, 282, 330 <sup>[b]</sup>   | 399 <sup>[b]</sup>            | 3.74 <sup>[c]</sup> | 3.03 <sup>[b]</sup><br>3.10 <sup>[c]</sup> | 0.64 <sup>[c]</sup>                         | 0.24                |                        | -6.56 <sup>[f]</sup><br>7.48 <sup>[g]</sup> | -3.11 <sup>[f]</sup><br>4.46 <sup>[h]</sup> |                                 |
| <b>DPEQPO</b> | 228, 262, 302 <sup>[a]</sup>   | 311 <sup>[a]</sup>            | 3.28 <sup>[a]</sup> | 2.98 <sup>[a]</sup>                        | 0.31 <sup>[a]</sup>                         | 0.05 <sup>[c]</sup> | 219/421 <sup>[e]</sup> | -6.46 <sup>[c]</sup>                        | -1.06 <sup>[c]</sup>                        | 10.99 <sup>[c]</sup>            |
|               | 232, 285 <sup>[b]</sup>        | 313, 370 <sup>[b]</sup>       | 4.58 <sup>[c]</sup> | 3.03 <sup>[b]</sup><br>3.13 <sup>[c]</sup> | 1.45 <sup>[c]</sup>                         | 0.16                |                        | -6.54 <sup>[f]</sup><br>8.31 <sup>[g]</sup> | -2.83 <sup>[f]</sup><br>5.03 <sup>[h]</sup> |                                 |

[a] In toluene solution ( $10^{-6}$  mol L<sup>-1</sup>); [b] in film; [c] Gaussian simulation results of single molecules; [d] singlet-triplet splitting; [e] temperature at weight loss of 5%; [f] calculated according to cyclic voltammetric results; [g] Ionization potential (IP) and [h] electron affinity (EA) values measured with UV photoelectronic spectra (UPS).

## VIII. References

- [1] J. Zhang, D. Ding, Y. Wei, F. Han, H. Xu, W. Huang, *Adv. Mater.* 2016, 28, 479.
- [2] A. D. Becke, *J. Chem. Phys.* 1993, 98, 5648.
- [3] C. Lee, W. Yang, R. G. Parr, *Phys. Rev. B* 1988, 37, 785.
- [4] R. L. Martin, *J. Chem. Phys.* 2003, 118, 4775.
